# Supplementary material
Source: PubMed Central journal article supplement (PMC6796938)
Supplement: 41422_2019_195_MOESM1_ESM.pdf [file 41422_2019_195_MOESM1_ESM.pdf]

# Supplementary information, Figure S1

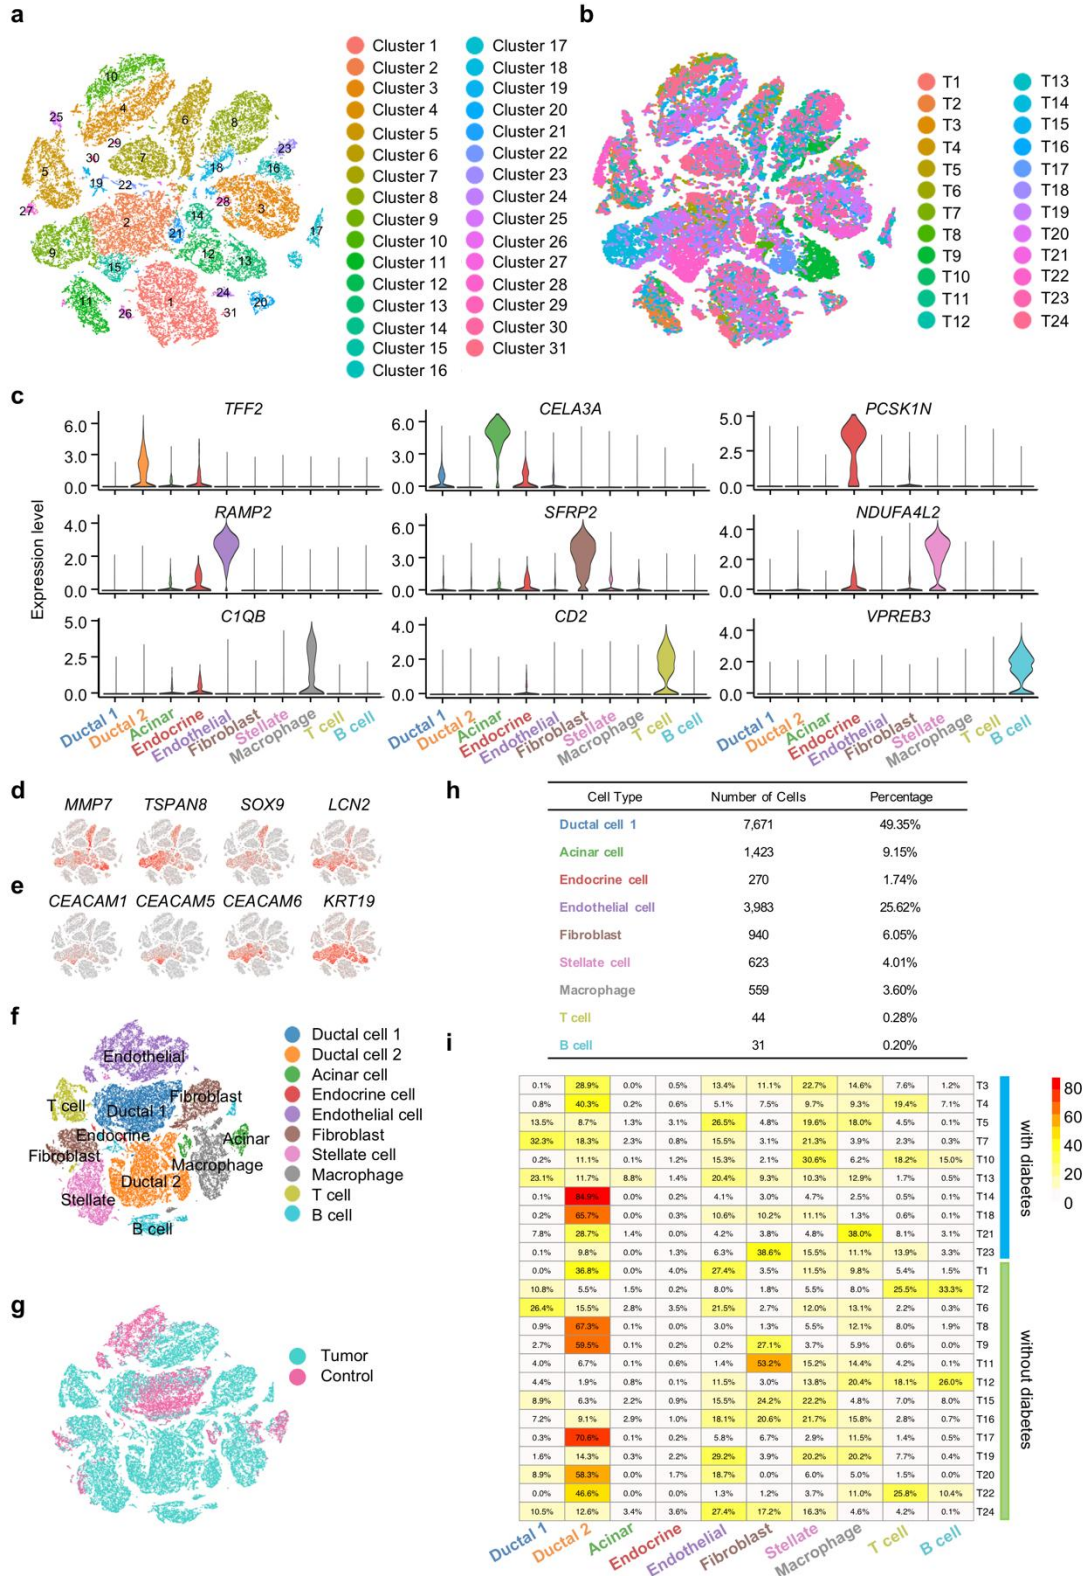

**Figure S1. Cell Clusters in PDAC and Control Samples, Related to Figure 1**

**(a-b)** t-SNE plot demonstrates clusters present in PDAC patients. Each color-coded region indicates one cluster **(a)** or one PDAC patient **(b)**.

**(c)** Violin plots showing the expression level of representative novel identified markers across the main cell types in PDAC. The y axis shows the normalized read count.

**(d-e)** Expression levels of representative markers for ductal cells **(d)** and type 2 ductal cells **(e)** are plotted onto the t-SNE map. Color key from grey to red indicates relative expression levels from low to high.

**(f-g)** t-SNE plot demonstrates cell types **(f)** and sample origin (tumor or control pancreases) **(g)** in pooled PDAC and control samples.

**(h)** Cell number and percentage of assigned cell types in control samples.

**(i)** Composition of 10 cell types in each PDAC sample with/without diabetes.
