# Supplementary material
Source: PubMed Central journal article supplement (PMC6796938)
Supplement: 41422_2019_195_MOESM2_ESM.pdf [file 41422_2019_195_MOESM2_ESM.pdf]

# Supplementary information, Figure S2

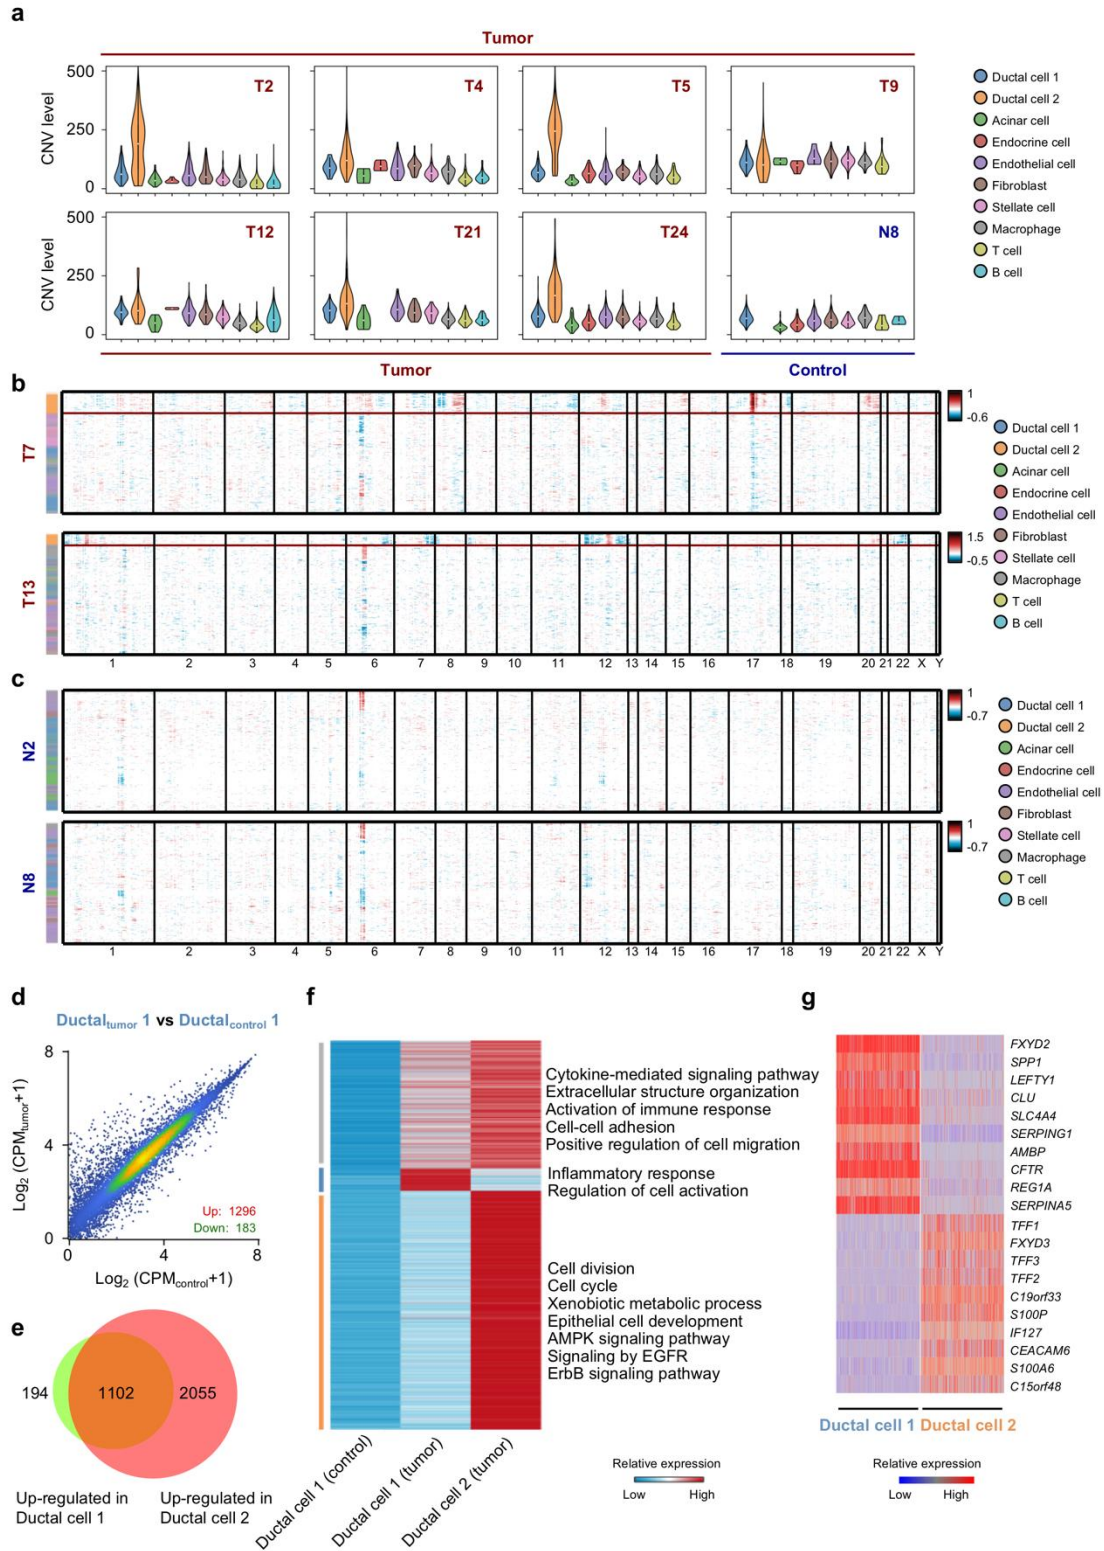

**Figure S2. Intratumoral Heterogeneity of Malignant and Abnormal Cells in PDAC, Related to Figure 2**

(a) Violin plots showing distributions of CNV scores among different cell types from other 7 representative PDAC and 1 representative control samples.

(b-c) Heatmap showing large-scale CNVs of all cell types from 2 representative PDAC (b) and 2 representative control (c) samples. The normalized CNV levels were shown, the red color represents high CNV level and blue represents low CNV level.

(d) Scatter plots showing gene expression level of type 1 ductal cells in normal pancreas (x axis) and PDAC neoplastic tissues (y axis). CPM (Counts per million) value was used to represent the normalized read count for each gene.

(e) Venn diagram showing the overlap of up-regulated genes in type 1 (left) and type 2 (right) PDAC ductal cells compared to ductal cells in control samples.

(f) Heatmap showing the average expression level of up-regulated genes in different subsets of ductal cells. The representative enriched GO terms and pathways were shown.

(g) Heatmap showing expression levels of specific markers in ductal cell type 1 and 2. Color key from blue to red indicates relative expression levels from low to high.
