# Supplementary material
Source: PubMed Central journal article supplement (PMC6796938)
Supplement: 41422_2019_195_MOESM6_ESM.pdf [file 41422_2019_195_MOESM6_ESM.pdf]

# Supplementary information, Figure S6

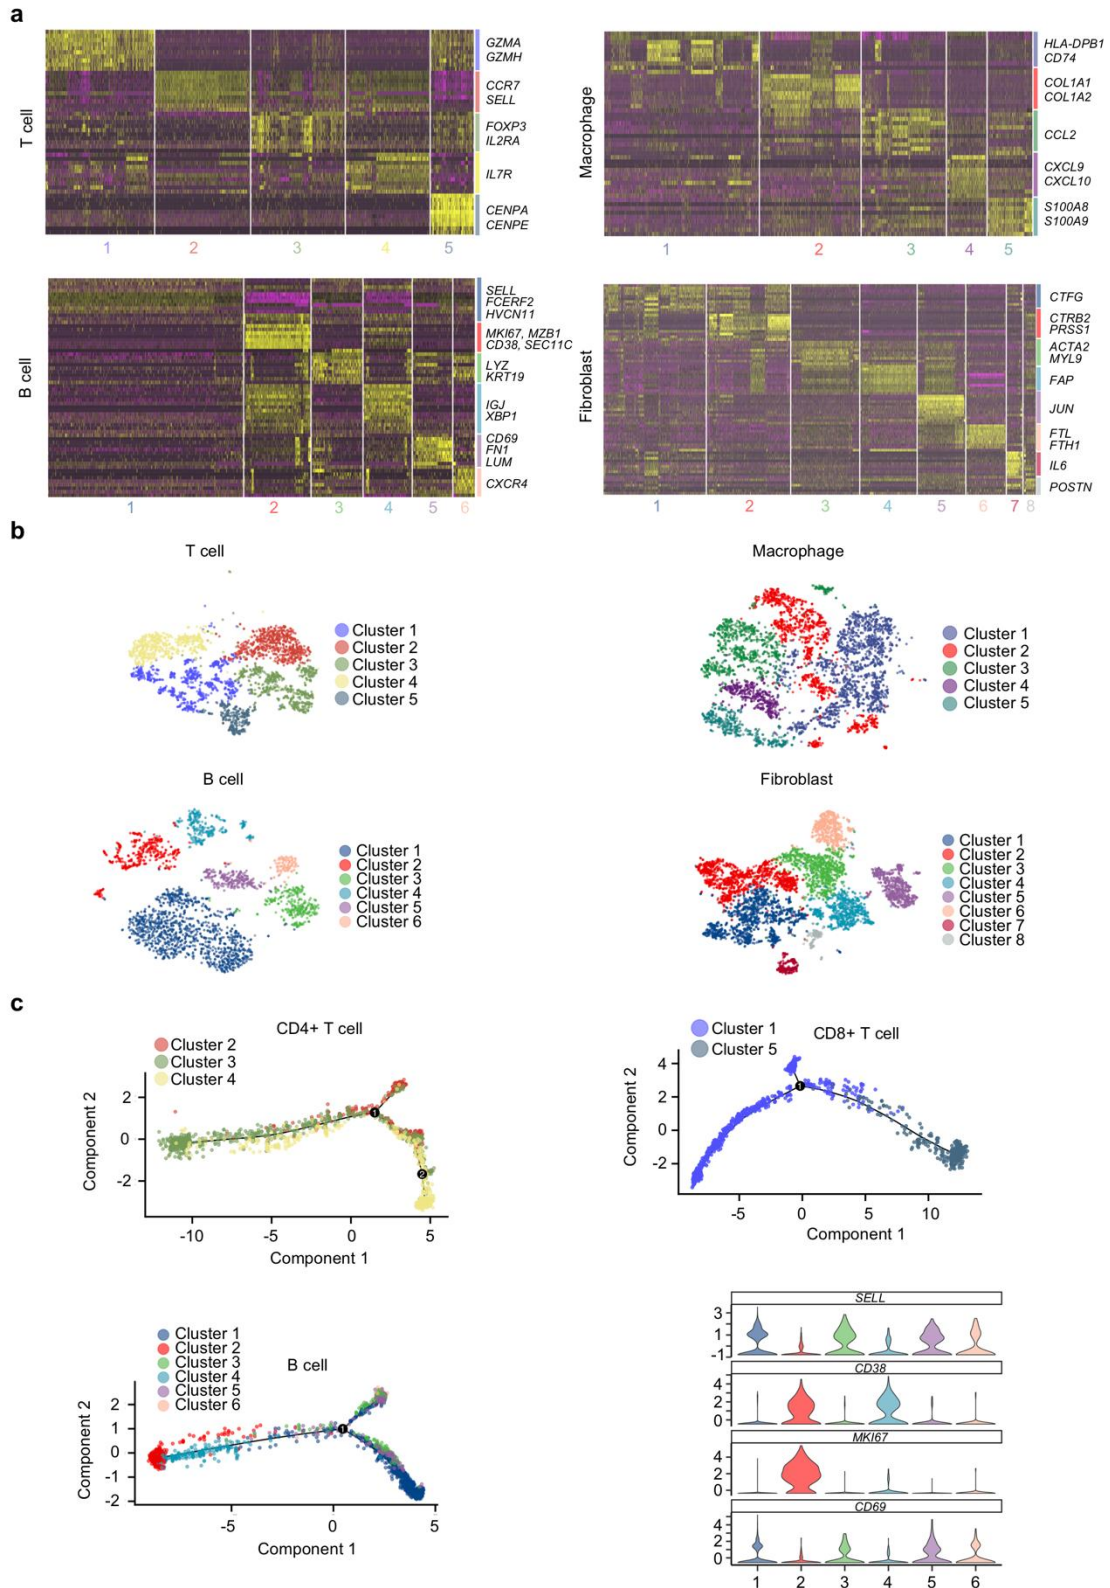

**Figure S6. T cell, B cell, Macrophage and Fibroblast clusters in PDAC single cells.**

(a) Heatmap showing expression levels of specific markers in each T cell, B cell, macrophage and fibroblast subtypes, respectively.

(b) The t-SNE plot demonstrating cell subtypes in T cell, B cell, macrophage and fibroblast.

(c) Pseudo-time of CD4 T cells, CD8 T cells as well as B cells inferred by Monocle2. And violin plots displaying the expression of markers for B cell subtypes in each B cell cluster.
